# Supplementary material for: In situ copper isotope analysis by femtosecond laser ablation multicollector inductively coupled plasma mass spectrometry (fs-LA-MC-ICP-MS) on historical gold coins
Source: Royal Society of Chemistry journal article supplement (doi:10.1039/d4ja00217b), 2024-11-29

## Electronic Supplementary Information 1

Evolution of ablation craters morphology by fs-LA-MC-ICP-MS. The ablation conditions are the same as for pre-cleaning, but carried out on a copper matrix in the open air.

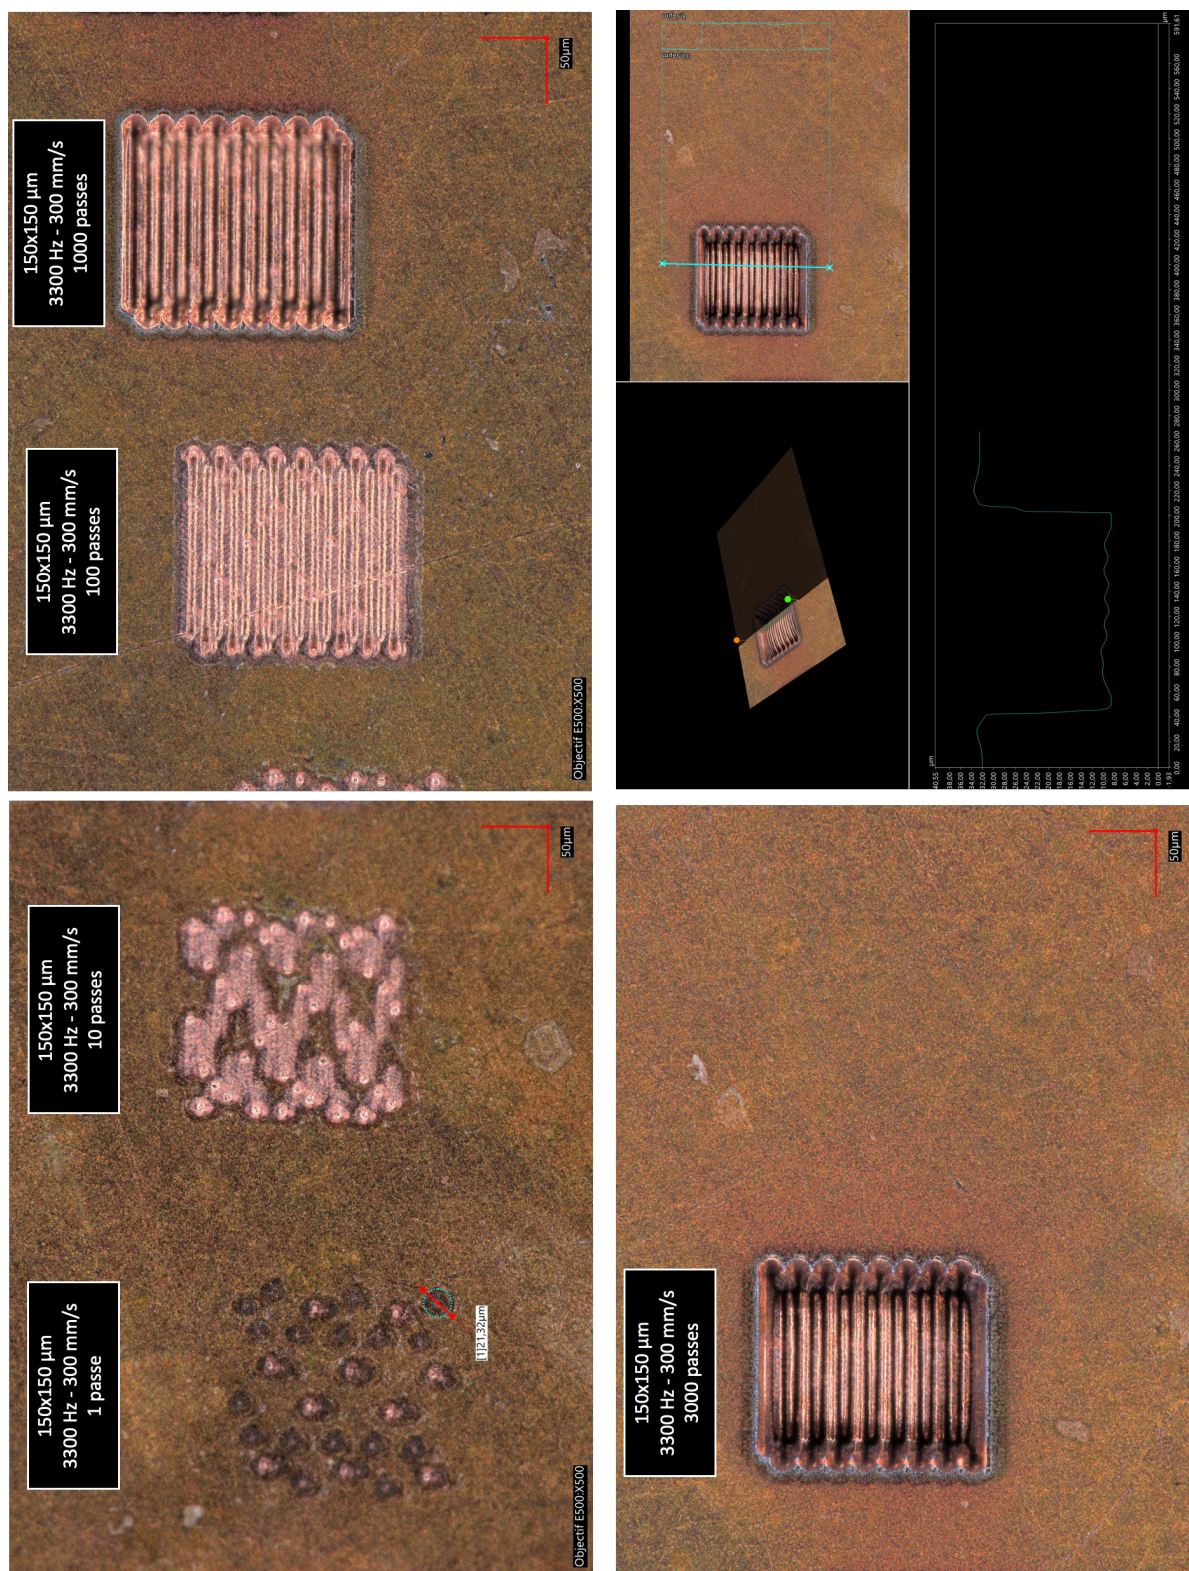

Supplement: d4ja00217b1.pdf [file d4ja00217b1.pdf]
